# Supplementary material for: Development and validation of a new patient experience tool in patients with serious illness
Source: PubMed Central journal article supplement (PMC5203706; doi:10.1186/s12904-016-0172-x), 2016-12-30
Supplement: 12904_2016_172_MOESM1_ESM.pdf [file 12904_2016_172_MOESM1_ESM.pdf]

## Eligibility criteria for hospice

| Diagnosis          | Main criteria<br>(generally these clinical indicators are present)                                                                                                                                                                                                                                                                                                                                                                                                                                    | Supporting criteria                                                                                                                                                                                                                                                                                                             | Comments                                                                                                                                                                     |
|--------------------|-------------------------------------------------------------------------------------------------------------------------------------------------------------------------------------------------------------------------------------------------------------------------------------------------------------------------------------------------------------------------------------------------------------------------------------------------------------------------------------------------------|---------------------------------------------------------------------------------------------------------------------------------------------------------------------------------------------------------------------------------------------------------------------------------------------------------------------------------|------------------------------------------------------------------------------------------------------------------------------------------------------------------------------|
| General guidelines | <ol style="list-style-type: none"> <li>1. Life-limiting condition; estimated prognosis of six months or less. <i>“Is this patient sick enough to die in the next 6 months?”</i></li> <li>2. Patient and/or family have elected treatment of symptoms, not cure of underlying disease</li> <li>3. One of the following: <ul style="list-style-type: none"> <li>◆ Clinical progression of disease</li> <li>◆ Impaired nutrition related to the terminal process with weight loss</li> </ul> </li> </ol> | <ul style="list-style-type: none"> <li>◆ Multiple ER visits or hospitalizations</li> <li>◆ Dependence in 2 or more ADLs (bathing, dressing, feeding, transfers, continence, independent ambulation)</li> <li>◆ Karnovsky &lt; 70%</li> <li>◆ Unintentional 10% weight loss over 6 months</li> <li>◆ Albumin &lt; 2.5</li> </ul> | Co-morbid conditions, the severity of which is likely to contribute to a life expectancy of 6 months or less should be considered.                                           |
| Heart disease      | <ol style="list-style-type: none"> <li>1. NYHA Class IV (symptoms of dyspnea or angina virtually at rest)</li> <li>2. Optimal medical treatment</li> <li>3. Not a candidate for transplant</li> <li>4. Pump failure</li> </ol>                                                                                                                                                                                                                                                                        | <ul style="list-style-type: none"> <li>◆ Resistant arrhythmias</li> <li>◆ History of cardiac arrest</li> <li>◆ Unexplained syncope</li> <li>◆ HIV disease</li> <li>◆ Symptomatic with any physical activity</li> </ul>                                                                                                          | EF 20% or less is helpful objective evidence<br>HX of cardiac arrest, resuscitation, unexplained syncope or brain embolus of cardiac origin could contribute to eligibility. |
| Pulmonary disease  | <ol style="list-style-type: none"> <li>1. Disabling dyspnea at rest with decreased functional ability</li> <li>2. Disease progression (increased hospitalizations, pulm, infections, respiratory failures)</li> <li>3. Serial decrease FEV1&gt;40ml/yr (not nec. to obtain)</li> </ol>                                                                                                                                                                                                                | <ul style="list-style-type: none"> <li>◆ Cor pulmonale or right heart failure</li> <li>◆ Rest pO<sub>2</sub> &lt;= 55 mm</li> <li>◆ SaO<sub>2</sub> &lt;= 0.88 on supplemental O<sub>2</sub></li> <li>◆ PCO<sub>2</sub> =&gt;50 mm</li> <li>◆ Resting tachycardia &gt; 100</li> <li>◆ Progressive weight loss</li> </ul>        | FEV <sub>1</sub> < 30% predicted after bronchodilator therapy.                                                                                                               |
| Dementia           | <ol style="list-style-type: none"> <li>1. Dependence in <i>all</i> ADLs (ambulating, dressing, bathing, urine/stool continence)</li> <li>2. No meaningful verbal communication (6 or fewer words)</li> <li>3. Presence of a medical complication in past year</li> <li>4. FAST assessment of &lt;=7</li> </ol>                                                                                                                                                                                        | Medical complications (e.g.): <ul style="list-style-type: none"> <li>◆ Aspiration pneumonia</li> <li>◆ Upper UTI/pyelonephritis</li> <li>◆ Sepsis</li> <li>◆ Stage 3-4 pressure ulcers</li> <li>◆ Recurrent fever after antibiotics</li> </ul>                                                                                  | Inability to maintain sufficient fluid and calorie intake or serum albumin of <2.5gm/dl also indicate decline.                                                               |
| Liver disease      | <ol style="list-style-type: none"> <li>1. Severely impaired liver function (albumin &lt; 2.5, prolonged INR &gt;1.5, prothrombin &gt;5 sec)</li> <li>2. One of the following: ascites, hepatorenal syndrome, hepatic encephalopathy, recurrent variceal bleeding, bacterial peritonitis</li> </ol>                                                                                                                                                                                                    | <ul style="list-style-type: none"> <li>◆ Progressive malnutrition, muscle wasting</li> <li>◆ Active drinking</li> <li>◆ Hepatocellular carcinoma</li> <li>◆ Hepatitis B</li> <li>◆ Hepatitis C refractory to interferon tx</li> </ul>                                                                                           |                                                                                                                                                                              |

| <b>Diagnosis</b>              | <b>Main criteria<br/>(generally these clinical indicators are present)</b>                                                                                                                                                                                                                                                                                                                         | <b>Supporting criteria</b>                                                                                                                                                                                                                                                                        | <b>Comments</b>                                                                                                                                                                                                                               |
|-------------------------------|----------------------------------------------------------------------------------------------------------------------------------------------------------------------------------------------------------------------------------------------------------------------------------------------------------------------------------------------------------------------------------------------------|---------------------------------------------------------------------------------------------------------------------------------------------------------------------------------------------------------------------------------------------------------------------------------------------------|-----------------------------------------------------------------------------------------------------------------------------------------------------------------------------------------------------------------------------------------------|
| Renal disease                 | <ol style="list-style-type: none"> <li>1. Creatinine clearance &lt; 10cc/min (&lt;15 cc/min for diabetes), GFR &lt;10ml/min</li> <li>2. Creatinine &gt; 8 (&gt;6 for diabetics)</li> <li>3. Signs and symptoms: uremic syndrome, oliguria, intractable hyperkalemia, pericarditis, intractable fluid overload</li> <li>4. Not seeking dialysis or transplant, or discontinuing dialysis</li> </ol> | <ul style="list-style-type: none"> <li>◆ Mechanical ventilation</li> <li>◆ Cancer</li> <li>◆ COPD</li> <li>◆ CHF</li> <li>◆ Liver disease</li> <li>◆ Sepsis</li> <li>◆ Albumin &lt; 3.5, PLT &lt; 25,000, Age &gt; 75</li> </ul>                                                                  | <p>Dialysis does not preclude eligibility for hospice but continuation with life extension beyond 6 months would impact eligibility.</p> <p>Another diagnosis for terminal status could be appropriate with the continuation of dialysis.</p> |
| Stroke and coma               | <ol style="list-style-type: none"> <li>1. Coma/vegetative state persisting beyond 3 days' duration</li> <li>2. Karnofsky or palliative performance scale of &lt;40.</li> <li>3. Dysphagia severe enough to prevent continuation of fluids/food necessary to sustain life without artificial nutrition.</li> </ol>                                                                                  | <ul style="list-style-type: none"> <li>◆ Absent verbal response</li> <li>◆ Absent pain withdrawal</li> <li>◆ Creatinine &gt; 1.5</li> <li>◆ Age &gt; 70</li> <li>◆ Abnormal brain stem response</li> <li>◆ Diagnostic imaging which support poor prognosis</li> </ul>                             | <p>Additionally, documentation in the previous 12 months of aspiration pneumonia, pyelonephritis, stage 3 or 4 decubitis, recurrent fever after antibiotics.</p>                                                                              |
| Amyotrophic Lateral Sclerosis | <ol style="list-style-type: none"> <li>1. Rapid progression (most of disability developing within the last 12 months)<br/><b>AND</b></li> <li>2. One of the following: <ul style="list-style-type: none"> <li>◆ Critically impaired ventilatory capacity / FVC &lt; 30% predicted</li> <li>◆ Critical nutritional impairment</li> <li>◆ Life-threatening complication</li> </ul> </li> </ol>       | <p>Complications:</p> <ul style="list-style-type: none"> <li>◆ Aspiration pneumonia</li> <li>◆ Upper UTI</li> <li>◆ Sepsis</li> <li>◆ Stage 3-4 pressure ulcers</li> <li>◆ Recurrent fever after antibiotics</li> </ul>                                                                           | <p>The decision to institute either artificial ventilation or artificial feeding may significantly alter 6 month prognosis.</p> <p>Neurologist exam within 3 months of hospice assessment is recommended to confirm prognosis.</p>            |
| HIV disease                   | <ol style="list-style-type: none"> <li>1. Viral load &gt; 100,000<br/><b>OR</b></li> <li>2. Lower viral load, but foregoing ARV and prophylactic therapy</li> <li>3. CD4+ count &lt;25 when patient is free of acute illness</li> <li>4. Karnofsky scale at &lt;=50</li> </ol>                                                                                                                     | <ul style="list-style-type: none"> <li>◆ CNS lymphoma</li> <li>◆ Wasting syndrome (33% of lean body mass)</li> <li>◆ Kaposi's involving viscera, unresponsive to therapy</li> <li>◆ Renal failure</li> <li>◆ Advanced dementia, PML</li> <li>◆ Toxo, crypto, MAC bacteremia, untreated</li> </ul> | <p>Albumin &lt; 2.5</p> <p>Ongoing substance abuse</p> <p>Age &gt; 50</p> <p>CHF, dilated cardiomyopathy</p> <p>Chronic persistent diarrhea &gt;1 year</p>                                                                                    |
| Cancer                        | <ol style="list-style-type: none"> <li>1. Disease with metastases or progression from an earlier stage of disease to metastatic disease</li> </ol>                                                                                                                                                                                                                                                 | <ul style="list-style-type: none"> <li>◆ Continued decline in spite of therapy</li> <li>◆ Patient declines further disease directed therapy.</li> </ul>                                                                                                                                           | <p>Certain cancers with poor prognosis (e.g. small cell lung cancer, brain cancer and pancreatic cancer) may be hospice eligible without other eligibility criteria listed.</p>                                                               |

**These guidelines were developed from the LCD-determining terminal illness guidelines provided by CMS.  
For further information related to hospice care, call the Allina Health Care Navigation Help Desk at 612-262-2200.**
